# Supplementary material for: Increased methane production associated with community shifts towards Methanocella in paddy soils with the presence of nanoplastics
Source: PubMed Central journal article supplement — Microbiome. 2024 Dec 20;12:259. doi: 10.1186/s40168-024-01974-y (PMC11660960; doi:10.1186/s40168-024-01974-y), 2024-12-20
Supplement: 40168_2024_1974_MOESM1_ESM.pdf [file 40168_2024_1974_MOESM1_ESM.pdf]

1 **Increased methane production associated with community shifts towards**  
2 ***Methanocella* in paddy soils with the presence of nanoplastics**

3 Zhibin He<sup>1</sup>, Yarong Hou<sup>1</sup>, Ying Li<sup>1</sup>, Qicheng Bei<sup>2</sup>, Xin Li<sup>3</sup>, Yong-Guan Zhu<sup>4</sup>, Werner  
4 Liesack<sup>5</sup>, Matthias C. Rillig<sup>6</sup>, Jingjing Peng<sup>1\*</sup>.

5 <sup>1</sup>State Key Laboratory of Nutrient Use and Management, College of Resources and  
6 Environmental Sciences, National Academy of Agriculture Green Development, Key  
7 Laboratory of Plant-Soil Interactions, Ministry of Education, China Agricultural  
8 University, Beijing, 100193, China.

9 <sup>2</sup>Department of Biological Sciences, University of Southern California, Los Angeles,  
10 CA, 90089-0371, USA.

11 <sup>3</sup>Institute of Agricultural and Nutritional Sciences, Martin-Luther-Universität Halle-  
12 Wittenberg, Betty-Heimann-Strasse 5, Halle (Saale), Germany.

13 <sup>4</sup>State Key Laboratory of Urban and Regional Ecology, Research Centre for Eco-  
14 Environmental Sciences, Chinese Academy of Sciences, Beijing, 100085, China.

15 <sup>5</sup>Max Planck Institute for Terrestrial Microbiology, Karl-von-Frisch-Str. 10, Marburg,  
16 35043, Germany.

17 <sup>6</sup>Institute of Biology, Freie Universität Berlin, Berlin, 14195, Germany.

18 \* Correspondence: [jingjing.peng@cau.edu.cn](mailto:jingjing.peng@cau.edu.cn) (Jingjing Peng)

19

20

**Pages**

|    |                                           |               |
|----|-------------------------------------------|---------------|
| 21 | <b>Supplemental materials and methods</b> | <b>3 - 9</b>  |
| 22 | <b>Supplemental discussion</b>            | <b>10- 14</b> |
| 23 |                                           |               |

## 24 **Supplemental materials and methods**

### 25 **1.1 LDPE nanoplastics and soil sampling**

26 Low-Density Polyethylene (LDPE) (density: 0.91 g/cm<sup>3</sup>) nanoparticles (NPs) with size  
27 of 50 nm were purchased from ZhongXin Plastic (Guangdong, China). Nanoplastics  
28 were sterilized with methanol, dried at 40 °C, and stored at 4 °C for further use [1]. Soil  
29 samples were collected in August 2019 from two typical rice-growing areas that differ  
30 in their soil types, defined as Black soil (BS) and Red soil (RS) in China. At each  
31 sampling site, we collected five soil cores with a depth of 0-20 cm during the drainage  
32 period of rice grouting. All soil cores were air-dried and sieved through 2 mm meshes  
33 to remove visible plant residues, roots, and stones.

### 34 **1.2 Process measurements**

35 The liquid and soil samples were immediately shock-frozen using liquid nitrogen and  
36 stored at -80 °C for molecular analysis. One subsample of each microcosm was freeze-  
37 dried and used for the extraction of dissolved organic carbon (DOC). A soil sample (2  
38 g) from each of the 36 microcosms (two soil types × two time points × three treatments  
39 × three biological replicates) were subjected to DOC extraction using 1:10 (w/v)  
40 soil/ultrapure water. The soil microcosms were shaken for 1 min at 25 °C, placed  
41 statically for 20 min, and the supernatant was further filtered through a pre-rinsed 0.22  
42 µm cellulose acetate membrane filter [1, 2]. Then, the DOC concentrations were  
43 determined using a total organic carbon analyzer (Elementar, Langenselbold, Germany).

44 A trace amount of the sample was affixed to the plate using conductive adhesive.  
45 Subsequently, samples were coated with platinum using a Quorum SC7620 sputter  
46 coater to establish the conductivity of the samples. A field emission scanning electron  
47 microscope (SEM; TESCAN MIRA LMS, Czech) was used to characterize the surface  
48 of recovered nanoplastic particles. The primary SEM parameters were 10,000 ×  
49 magnification and 3 kV acceleration voltage. The solid-phase extraction of dissolved  
50 organic matter (DOM) from soil samples were conducted using Fourier transform ion  
51 cyclotron resonance (FT-ICR-MS) [1]. Three replicates of each treatment (control, 0.5%  
52 NPs, 5% NPs) were merged to produce one composite sample for the analysis of the  
53 black soil and the red soil. The van Krevelen diagram was performed to cross-plot  
54 hydrogen-to-carbon (H/C) and oxygen-to-carbon (O/C) element ratios. To assess DOM  
55 lability, the molecular lability boundary (MLBL) was calculated by the number of  
56 formulas with  $H/C \geq 1.5$  divided by the total number of formulas in the sample [1]. All  
57 formulas were subdivided into four major classes as follows: CHO (containing C, H,  
58 and O); CHON (containing C, H, O, and N); CHOS (containing C, H, O, and S); and  
59 CHONS (containing C, H, O, N, and S). The formulas plotted in the van Krevelen  
60 diagram could be categorized into the following seven groups based on H/C and O/C  
61 ratios: (i) lipid-like (H/C, 1.5–2.0; O/C, 0–0.3); (ii) protein/amino sugar-like (H/C,  
62 1.5–2.2; O/C, 0.3–0.67); (iii) carbohydrate-like (H/C, 1.5–2.2; O/C, 0.67–1.2); (iv)  
63 highly unsaturated and phenolic-like (H/C, 0.7–1; O/C, 0–0.1); (v) lignin-like (H/C,

64 0.7–1.5; O/C, 0.1–0.67); (vi) tannin-like (H/C, 0.5–1.5; O/C, 0.67–1.2); and (vii)  
65 condensed aromatic-like compounds (H/C, 0.2–0.7; O/C, 0–0.67) [1].

### 66 **1.3 DNA and RNA extraction**

67 Total soil DNA was extracted using the PowerSoil DNA Isolation Kit (MOBIO  
68 Laboratories, Carlsbad, USA) from 0.25 g wet soil following the manufacturer's  
69 instructions. The purity and concentration of DNA extracts were checked by NanoDrop  
70 spectrophotometry (NanoDrop Technologies Inc., Wilmington, DE, USA). The DNA  
71 extracts were stored at  $-20^{\circ}\text{C}$  until molecular analysis (quantitative PCR and  
72 metagenomics).

73 Total RNA was isolated from the soil slurries using a previously described method  
74 [3]. In brief, 0.5 g of wet soil was mixed with glass beads and suspended in TPM buffer  
75 (consisting of 0.5 M Tris pH 7.0, 1.7% polyvinylpyrrolidone, and 0.2 M  $\text{MgCl}_2$ ). Then  
76 the mixture was thoroughly vortexed and centrifuged at  $20,000 \times g$  for 5 minutes. The  
77 pellet was resuspended in PBL buffer comprising 0.05 M Tris pH 7.0, 0.05 M  $\text{Na}_2\text{EDTA}$ ,  
78 0.1% SDS w/v, and 6% v/v phenol. The resulting supernatant was extracted with  
79 phenol-chloroform-isoamyl alcohol and chloroform-isoamyl alcohol. The RNA was  
80 precipitated with isopropanol and resuspended in 50  $\mu\text{l}$  of TE buffer. Finally, genomic  
81 DNA was removed using the TURBO DNA-free kit (Ambion, USA) according to the  
82 manufacturer's instructions. The total RNA was concentrated and purified using the  
83 RNeasy MinElute Kit (Qiagen) following the kit's protocol.

#### 84 **1.4 Metagenomic analysis**

85 Metagenomic libraries were constructed using size selection to fragment lengths  
86 ranging from 300 to 500 bp [4]. This fragment length range was validated using an  
87 Agilent Technologies 2100 Bioanalyzer with a High Sensitivity DNA chip according to  
88 the manufacturer's instructions (Agilent Technologies, Palo Alto, CA). Subsequently,  
89 36 metagenomic libraries were generated and sequenced on an Illumina HiSeq 2000  
90 instrument in a 2×150 bp paired-end mode at Novogene Bioinformatics Technology.  
91 Quality control of the raw reads was conducted using Trimmomatic (version 0.35) [5],  
92 including the removal of the adapter sequences, low-quality bases (quality scores < 20),  
93 undetermined reads ("N" larger than 5%), and short reads (< 100 bp) [4]. The high-  
94 quality paired-end reads from each sample were individually assembled into contigs  
95 using MEGAHIT (version 1.1.3) with the recommended parameters (-k-min 21 -k-max  
96 141 -k-step 20) [6]. The quality of the resulting contigs was assessed using QUAST 2.3.  
97 The metagenomic contigs were queried in Prokka and BLAST against the NCBI non-  
98 redundant (nr) protein database using Diamond with default settings [7, 8]. The  
99 functional profiling of each metagenomic dataset was achieved by aligning its contigs  
100 against clusters of the orthologous groups (COG) database using MEGAN6 Ultimate  
101 Edition (version 6.20.5) [9, 10].

102 The functional annotations related to carbon metabolic categories were classified  
103 into aromatic and carbohydrate carbon classes (Table S2) [11]. Taxonomic assignment

104 of the aromatic and carbohydrate genes was carried out using Kraken2 with default  
105 settings [12]. To obtain the taxonomic profiles of those genes functionally annotated by  
106 the Kyoto Encyclopedia of Genes and Genomes (KEGG) database, this particular set  
107 of sequence reads was extracted and blasted against the NCBI's non-redundant (nr)  
108 protein database using Diamond with the default settings as described previously [3].  
109 Parsing and downstream analysis of the BLAST outputs were performed using  
110 MEGAN6 Ultimate Edition [10].

### 111 **1.5 Genome binning and annotation of MAGs**

112 Genome binning of the assembled contigs was carried out using metaWrap with default  
113 settings [13]. The completeness and contamination of the metagenome-assembled  
114 genomes (MAGs) were evaluated using CheckM (Version 1.1.2) [14], and the MAGs  
115 with completeness > 70% and contamination < 10% were used for further taxonomic  
116 assignment and functional analysis. The taxonomic classification was done using  
117 GTDB-Tk (v.1.3.0) [15]. Open reading frames were predicted using Prokka (version  
118 1.14.6) and searched against the NCBI-nr and KEGG databases using Diamond with  
119 an e-value threshold of  $10^{-5}$  [7, 16]. Phylogenomic trees were constructed using the  
120 maximum-likelihood method with IQ-TREE software and adopting the LG+F+R10  
121 model. The alignments comprised 120 bacterial and 122 archaeal marker genes using  
122 the GTDB-Tk tool. The maximum-likelihood tree was visualized in the online iTol  
123 platform (<https://itol.embl.de/>) [17]. CoverM was used to calculate the relative

124 abundances of each MAG with default parameters. The average nucleotide identity  
125 (ANI) values between MAGs were calculated based on the `get_homologues` package  
126 with default parameters [18].

## 127 **1.6 Metatranscriptomic analysis**

128 In total, three cDNA libraries were created from the following three treatments after an  
129 incubation period of 160 days: (i) red soil with 0 % NPs (RS-CK); (ii) red soil with 0.5 %  
130 NPs (RS-0.5% NPs); and (iii) black soil with 0.5 % NPs (BS-0.5% NPs). Slurry  
131 material of the three replicate microcosms of each treatment was mixed to produce a  
132 composite sample for cDNA library preparation, using the NEBNext Ultra Directional  
133 RNA Library Prep Kit for Illumina (New England BioLabs) according to the  
134 manufacturer`s manual. The cDNA yield was determined using a Qubit dsDNA HS  
135 assay kit (Qubit, ThermoFisher, USA). The Experion DNA 12K Analysis Kit (Experion,  
136 Bio-Rad, USA) was used to evaluate the cDNA quality. The three cDNA libraries were  
137 sequenced in paired-end mode ( $2 \times 150$  bp) with an Illumina HiSeq 2000 instrument at  
138 Novogene (Tianjin, China). A total of 20 Gbp of metatranscriptomic raw sequence data  
139 were generated for each sample.

140 All raw sequences were quality-trimmed using Trimmomatic [5]. The rRNA and  
141 tRNA sequences were then filtered using SortMeRNA to extract the mRNA reads [19].  
142 These were blasted against the NCBI-nr database using DIAMOND with the  
143 parameters described previously [3]. The BLAST outputs were taxonomically assigned



144 by the “lowest common ancestor” method implemented in MEGAN6 Ultimate Edition,  
145 using the top 10 percent of hits with e-value scores below  $10^{-5}$  [10]. Functional  
146 annotation of the mRNA reads was done using SEED subsystems and KEGG categories  
147 (newly updated version) implemented in MEGAN6 Ultimate Edition. To determine  
148 pathway- and gene-specific transcript abundances, mapping of the mRNA datasets onto  
149 the methanogen MAGs was performed using Bowtie2 [20] and MEGAN6 Ultimate  
150 Edition (version 6.20.5).

151

## 152 **Supplemental discussion**

### 153 **Soil-specific enhancement of CH<sub>4</sub> production in black and red soils**

154 Both the black soil and the red soil harbor highly complex microbial communities that  
155 in correspondence to the distinct soil physico-chemical properties [21], majorly differ  
156 in their taxonomic composition. This is well evidenced by the soil-specific abundance  
157 shifts of the bacterial community in response to the addition of LDPE NPs (Additional  
158 File 2: Fig. S11). Indeed, the metagenomic analysis revealed that, dependent on the  
159 particular treatment conditions, the 20 most abundant family-level groups in the black  
160 soil and the red soil only cover between 7.6% and 24.1% of the total bacterial  
161 community.

162 A total of 391 MAGs were identified to be of high quality (completeness > 70% and  
163 contamination < 10%) (Fig. S9). Most of the high-quality MAGs were affiliated with  
164 bacterial lineages, including Bacteroidetes (152), Proteobacteria (60), Firmicutes (38),  
165 Actinobacteriota (32), Chloroflexota (19), Acidobacteria (17), Dadabacteria (16),  
166 Desulfobacterota (6), Elusimicrobiota (5), Planctomyceota (3), Patescibacteria (3), and  
167 Omnitrophota (2). Among the various anaerobic methane oxidisers, we only detected  
168 *Ca. Methanoperedenaceae*. While its relative metagenomic abundance was below 0.81%  
169 across all the black soil treatments, no significant abundance change was observed in  
170 response to the NPs addition. No anaerobic methane oxidisers were detected in the red  
171 soil.

172 Driven by both the concentration of NPs and the incubation time, the metagenomic  
173 shift towards a significant increase in the methanogen abundance showed a highly  
174 significant correlation to the enhancement of CH<sub>4</sub> production ( $P < 0.001$ ). However,  
175 CH<sub>4</sub> production was not only in the 0.5% NPs treatments but also in the control  
176 treatments significantly lower in the black soil than in the red soil over the complete  
177 160-day incubation period, thereby indicating that soil-inherent traits also had a major  
178 impact on the CH<sub>4</sub> production in the 0.5% NPs treatments (compare CH<sub>4</sub> production  
179 between the black soil and the red soil in Fig. 1b). In addition to a significantly lower  
180 amount of microbial accessible carbon ( $P < 0.05$ ) (Additional File 2: Table S2), the  
181 lower CH<sub>4</sub> production in the black soil may be due to a greater bacterial accessibility to  
182 alternative electron acceptors, such as Fe(III), Mn(IV), NO<sub>3</sub><sup>-</sup>, and SO<sub>4</sub><sup>2-</sup>, which may  
183 have partly suppressed methanogenesis. This view is well corroborated by the fact that  
184 relative to the red soil, the microbiota in the black soil showed an extended duration of  
185 the lag phase in both the control treatment and the NPs treatments (0.5%, 5%) until CH<sub>4</sub>  
186 production occurred. Concomitantly, the transient accumulation of fermentation  
187 products, such as acetate and lactate, was delayed (Fig. 1b; Additional File 2: Fig. S5).

188 Obviously, the soil carbon utilization through the methanogenic food web majorly  
189 differed between the black soil and the red soil. In particular, the high abundance of the  
190 family Geobacteraceae after 30-day incubation in the black soil suggests an elongated  
191 initial reductive phase, which is characterized by utilizing the available, but with

192 incubation time limiting, alternative electron acceptors. LDPE NPs induced, relative to  
193 the control, a significant increase in metagenomic abundance of the Geobacteraceae  
194 during the first 30 days of incubation ( $P < 0.05$ ) (Additional File 2: Fig. S11), which is  
195 well explained by the significant increase in DOC (Fig. 1a). Members of the  
196 Geobacteraceae are metabolically versatile. Their key feature is the ability to couple the  
197 oxidation of acetate with the dissimilatory reduction of insoluble Fe(III) and Mn(IV),  
198 but these anaerobic bacteria are also able to utilize a variety of other electron acceptors,  
199 such as  $\text{NO}_3^-$ ,  $\text{NO}_2^-$ ,  $\text{N}_2\text{O}$ , sulfur, fumarate and malate. Depending on the *Geobacter*  
200 species, these bacteria are able to oxidize hydrogen and various organic acids [22]. In  
201 addition, some *Geobacter* spp. (e.g., *G. metallireducens*) have the capacity to oxidize  
202 aromatic compounds, such as benzene and phenol [23, 24]). Accordingly, the  
203 metagenomic abundance of the Geobacteraceae in the black soil NPs treatments was –  
204 relative to the control (3.76%) - significantly increased to 7.03%-7.36% after the 30-  
205 day incubation ( $P < 0.05$ ), albeit no  $\text{CH}_4$  (0.5% NPs) or only a low amount of  $\text{CH}_4$  (5%  
206 NPs) was detectable (compare  $\text{CH}_4$  production between the black and red soils in Figs.  
207 1b and Additional File 2: Fig. S2). In anoxic rice field soil, alternative electron acceptors  
208 are increasingly exhausted with incubation time [25]. In consequence, the metagenomic  
209 abundance of the Geobacteraceae in the black soil NPs treatments (0.5%, 5%) had  
210 significantly decreased from 7.03%-7.36% after the 30-day incubation period to 1.30%  
211 -2.17% after the 160-day incubation period ( $P < 0.001$ ); with the latter being in the  
212 abundance range observed for the Geobacteraceae in the red soil across all the

213 treatments (Additional File 2: Fig. S11).

214 The bacterial communities in the two soil types also differed in their putative  
215 propionate-oxidizing bacteria. While Peptococcaceae were specifically enriched in the  
216 black soil in response to the increasing NPs concentrations, the significant increase in  
217 abundance of the Syntrophaceae in the red soil was not driven by NPs but by incubation  
218 time ( $P < 0.05$ ) (Additional File 2: Fig. S11). A genus-level analysis revealed the NPs-  
219 induced enrichment of *Pelotomaculum* (Peptococcaceae) in the black soil, but the  
220 enrichment of *Smithella*-affiliated bacteria (Syntrophaceae) in the red soil with  
221 incubation time. Both genera have previously been demonstrated to syntrophically  
222 oxidize propionate in rice paddy soils [3, 26-29]. *Syntrophus* spp. are known to  
223 anaerobically degrade aromatics (benzoate) and fatty acids in syntrophic association  
224 with hydrogenotrophic methanogens [30]. In addition, relative to the control, the  
225 metagenomic abundance of Bacillaceae genes encoding H<sub>2</sub>-evolving hydrogenases had  
226 strongly increased in the LDPE NPs treatments after 160 days of incubation. Members  
227 of the Bacillaceae are – contrary to Syntrophomonadaceae – not known to  
228 syntrophically oxidize short-chain fatty acids (SCFAs), but are able to release hydrogen  
229 as a substrate for hydrogenotrophic methanogens [31]. The increase in metagenomic  
230 abundance of Bacillaceae H<sub>2</sub>-evolving hydrogenase genes was associated in the NPs  
231 treatments with a significant increase in the relative metagenomic abundance of total  
232 H<sub>2</sub>-evolving hydrogenase genes (compare Additional File 2: Figs. S12a and S12b).

233 Thus, the increase in metagenomic abundance of Bacillaceae genes encoding H<sub>2</sub>-  
234 evolving hydrogenases was linked to an increased metagenomic potential for hydrogen  
235 production, which additionally may have favored hydrogenotrophic methanogenesis.  
236 Finally, as discussed in the main text, the family-level composition of genes encoding  
237 the degradation of complex carbohydrates and aromatics clearly differed between the  
238 black soil and the red soil (Additional File 2: Figs. S18, S19, S20).

239

240 **References**

- 241 1. Sun Y, Li X, Li X, Wang J. Deciphering the fingerprint of dissolved organic matter in the soil  
242 amended with biodegradable and conventional microplastics based on optical and molecular  
243 signatures. *Environ Sci Technol*. 2022;56(22):15746-15759.
- 244 2. Romera-Castillo C, Pinto M, Langer TM, Alvarez-Salgado, XA, Herndl GJ. Dissolved organic  
245 carbon leaching from plastics stimulates microbial activity in the ocean. *Nat Commun*.  
246 2018;9(1):1430.
- 247 3. Peng J, Wegner CE, Bei Q, Liu P, Liesack W. Metatranscriptomics reveals a differential temperature  
248 effect on the structural and functional organization of the anaerobic food web in rice field soil.  
249 *Microbiome*. 2018;6(1):1-16.
- 250 4. Wu X, Rensing C, Han D, Xiao K, Dai Y, Tang Z, et al. Genome-resolved metagenomics reveals  
251 distinct phosphorus acquisition strategies between soil microbiomes. *mSystems*.  
252 2022;7(1):e0110721.
- 253 5. Bolger AM, Lohse M, Usadel B. Trimmomatic: a flexible trimmer for Illumina sequence data.  
254 *Bioinformatics*. 2014;30(15):2114-2120.
- 255 6. Li D, Liu C, Luo R, Sadakane K, Lam TW. MEGAHIT: an ultra-fast single-node solution for large  
256 and complex metagenomics assembly via succinct de Bruijn graph. *Bioinformatics*.  
257 2015;31(10):1674-1676.
- 258 7. Seemann T. Prokka: rapid prokaryotic genome annotation. *Bioinformatics*. 2014;30(14):2068-2069.
- 259 8. Buchfink B, Xie C, Huson DH. Fast and sensitive protein alignment using DIAMOND. *Nat*  
260 *Methods*. 2015;12(1):59-60.
- 261 9. Galperin MY, Makarova KS, Wolf YI, Koonin EV. Expanded microbial genome coverage and  
262 improved protein family annotation in the COG database. *Nucleic Acids Res*. 2015;43(D1):D261-  
263 D269.
- 264 10. Huson DH, Beier S, Flade I, Gorska A, El-Hadidi M, Mitra S, et al. MEGAN community edition-  
265 interactive exploration and analysis of large-scale microbiome sequencing data. *PLoS Comput Biol*.  
266 2016;12(6):e1004957.
- 267 11. Hartman WH, Ye R, Horwath WR, Tringe SG. A genomic perspective on stoichiometric regulation  
268 of soil carbon cycling. *ISME J*. 2017;11(12):2652-2665.
- 269 12. Wood DE, Lu J, Langmead B. Improved metagenomic analysis with Kraken 2. *Genome Biol*.

- 270 2019;20:1-13.
- 271 13. Uritskiy GV, DiRuggiero J, Taylor J. MetaWRAP-a flexible pipeline for genome-resolved  
272 metagenomic data analysis. *Microbiome*. 2018;6(1):158.
- 273 14. Parks DH, Imelfort M, Skennerton CT, Hugenholtz P, Tyson GW. CheckM: assessing the quality  
274 of microbial genomes recovered from isolates, single cells, and metagenomes. *Genome Res*.  
275 2015;25(7):1043-1055.
- 276 15. Parks DH, Chuvochina M, Waite DW, Rinke C, Skarshewski A, Chaumeil PA, et al. A standardized  
277 bacterial taxonomy based on genome phylogeny substantially revises the tree of life. *Nat Biotechnol*.  
278 2018;36(10):996-1004.
- 279 16. Kanehisa M, Goto S. KEGG: kyoto encyclopedia of genes and genomes. *Nucleic Acids Res*.  
280 2000;28(1):27-30.
- 281 17. Hug LA, Baker BJ, Anantharaman K, Brown CT, Probst AJ, Castelle CJ, et al. A new view of the  
282 tree of life. *Nat Microbiol*. 2016;1(5):1-6.
- 283 18. Contreras-Moreira B, Vinuesa P. GET\_HOMOLOGUES, a versatile software package for scalable  
284 and robust microbial pangenome analysis. *Appl Environ Microbiol*. 2013;79(24):7696-7701.
- 285 19. Kopylova E, Noe L, Touzet H. SortMeRNA: fast and accurate filtering of ribosomal RNAs in  
286 metatranscriptomic data. *Bioinformatics*. 2012;28(24):3211-3217.
- 287 20. Langmead B, Salzberg SL. Fast gapped-read alignment with Bowtie 2. *Nat Methods*.  
288 2012;9(4):357-359.
- 289 21. Xu C, Wang S, Li J, Ma Y, Sun W, Luo L, et al. Effects of long-term fertilization on evolution of S  
290 forms in a red soil and a black soil. *Chin J Appl Ecol*. 2014;25(4):1069-1075.
- 291 22. Straub KL, Buchholz-Cleven BE. *Geobacter bremensis* sp. nov. and *Geobacter pelophilus* sp. nov.,  
292 two dissimilatory ferric-iron-reducing bacteria. *Int J Syst Evol Microbiol*. 2001;51(5):1805-1808.
- 293 23. Zhang T, Bain TS, Nevin KP, Barlett MA, Lovley DR. Anaerobic benzene oxidation by *Geobacter*  
294 species. *Appl Environ Microbiol*. 2012;78(23):8304-8310.
- 295 24. Zhang T, Tremblay PL, Chaurasia AK, Smith JA, Bain TS. Anaerobic benzene oxidation via phenol  
296 in *Geobacter metallireducens*. *Appl Environ Microbiol*. 2013;79(24):7800-7806.
- 297 25. Achtnich C, Bak F, Conrad R. Competition for electron donors among nitrate reducers,  
298 ferric iron reducers, sulfate reducers, and methanogens in anoxic paddy soil. *Biol Fertil*  
299 *Soils*. 1995;19:65-72.



- 300 26. Lueders T, Pommerenke B, Friedrich MW. Stable-isotope probing of microorganisms thriving at  
301 thermodynamic limits: syntrophic propionate oxidation in flooded soil. *Appl Environ Microbiol.*  
302 2004;70(10):5778-5786.
- 303 27. Li H, Chang J, Liu P, Fu L, Ding D, Lu Y. Direct interspecies electron transfer accelerates  
304 syntrophic oxidation of butyrate in paddy soil enrichments. *Environ Microbiol.* 2015;17(5):1533-  
305 1547.
- 306 28. Xia X, Zhang J, Song T, Lu Y. Stimulation of *Smithella*-dominating propionate oxidation in a  
307 sediment enrichment by magnetite and carbon nanotubes. *Environ Microbiol Rep.* 2019;11(2):236-  
308 248.
- 309 29. Jin Y, Jiao S, Dolfing J, Lu Y. Thermodynamics shapes the biogeography of propionate-oxidizing  
310 syntrophs in paddy field soils. *Environ Microbiol Rep.* 2021;13(5):684-695.
- 311 30. Schink B. Energetics of syntrophic cooperation in methanogenic degradation. *Microbiol Mol Biol*  
312 *Rev.* 1997;61(2):262-280.
- 313 31. Su X, Zhao W, Xia D. The diversity of hydrogen-producing bacteria and methanogens within an in  
314 situ coal seam. *Biotechnol Biofuels.* 2018;11:1-18.

315
